# Supplementary material for: MyoD is a 3D genome structure organizer for muscle cell identity
Source: PubMed Central journal article supplement (PMC8752600; doi:10.1038/s41467-021-27865-6), 2022-01-11
Supplement: 41467_2021_27865_MOESM1_ESM.pdf [file 41467_2021_27865_MOESM1_ESM.pdf]

1  
2  
3  
4  
5  
6  
7  
8  
9  
10  
11  
12  
13  
14  
15  
16  
17  
18  
19  
20  
21  
22  
23

**Supplementary information for:**

**MyoD is a 3D genome structure organizer for muscle cell identity**

Ruiting Wang<sup>1,12</sup>, Fengling Chen<sup>2,12</sup>, Qian Chen<sup>1,12</sup>, Xin Wan<sup>1,12</sup>, Minglei Shi<sup>3</sup>, Antony K. Chen<sup>4</sup>, Zhao Ma<sup>4,5</sup>, Guohong Li<sup>6,7</sup>, Min Wang<sup>6,7</sup>, Yachen Ying<sup>4,5</sup>, Qinyao Liu<sup>1</sup>, Hu Li<sup>1,8</sup>, Xu Zhang<sup>9</sup>, Jinbiao Ma<sup>10</sup>, Jiayun Zhong<sup>10</sup>, Meihong Chen<sup>1</sup>, Michael Q. Zhang<sup>2,3,11\*</sup>, Yong Zhang<sup>1\*</sup>, Yang Chen<sup>1,2,3\*</sup> & Dahai Zhu<sup>1,8\*</sup>

The supplementary information includes:  
Supplementary Figure 1–7 and the figure legends

24

25

26

27

28

29

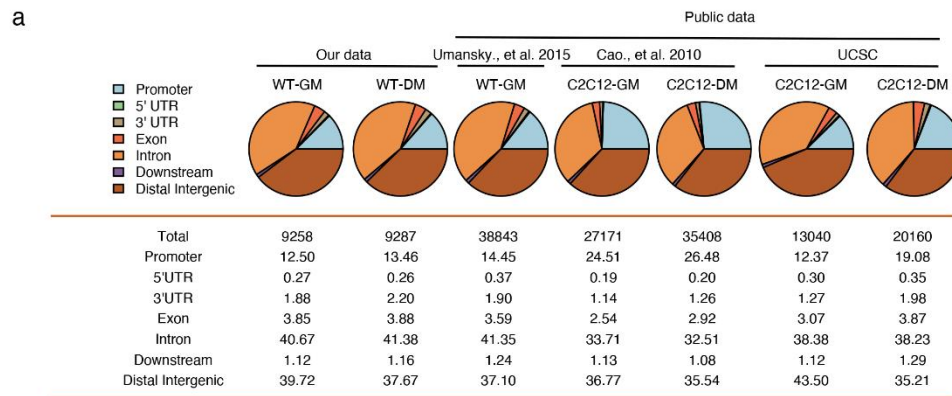

30

31

32

33

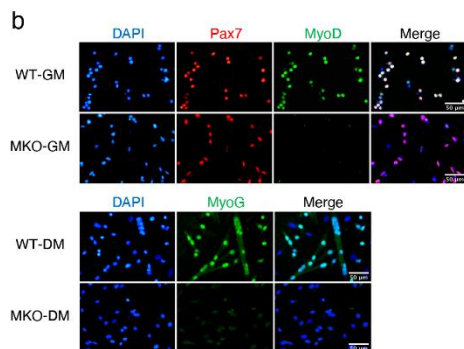

34

**c**

|        | library number | total PETs    | valid pairs   | valid pairs (mdup) | cis interaction | cis rate |
|--------|----------------|---------------|---------------|--------------------|-----------------|----------|
| WT-GM  | 6              | 3,063,829,481 | 1,421,548,060 | 989,503,435        | 815,437,090     | 82%      |
| WT-DM  | 8              | 3,398,918,116 | 1,507,933,582 | 1,080,862,988      | 808,788,438     | 75%      |
| MKO-GM | 6              | 2,526,066,578 | 1,303,369,549 | 732,185,200        | 641,222,613     | 88%      |
| MKO-DM | 8              | 3,201,103,857 | 1,427,828,726 | 971,256,657        | 714,955,332     | 74%      |

35

36

37

38

39

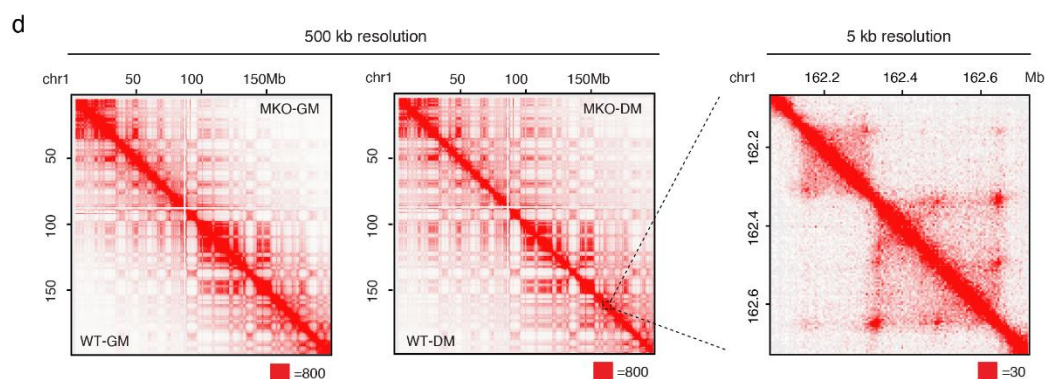

40

### Supplementary Fig. 1| Unveiled genome architectural functions of MyoD in muscle cells.

41

**a** Genomic distribution of MyoD binding peaks in proliferating or differentiating muscle cells.

42

WT represents primary muscle cells while C2C12 is a skeletal muscle cell line. MyoD

43

ChIP-seq data were from our study and public datasets of indicated references. Promoter is

44

defined as  $\pm 3$  kb from the transcription start site (TSS). **b** Representative images for

45

immunofluorescent staining of Pax7 (red), MyoD (green) and MyoG (green) in wild type

46

(WT) and MyoD knockout (MKO) proliferating muscle stem cells (myoblasts, cultured in

47

growth medium, GM) was shown at the upper panel. Corresponding data for differentiating

48 muscle stem cells (myocytes, induced to differentiation in differentiation medium, DM) was  
49 shown at the lower panel. DAPI (blue) served to visualize nucleus. The images are  
50 representatives of three independent experiments. Scale bars represent 50  $\mu\text{m}$ . **c** Depth and  
51 quality of sequencing data for BL-Hi-C libraries on four types of samples (WT-GM, WT-DM,  
52 MKO-GM and MKO-DM). **d** Hi-C map showing BL-Hi-C data in our study reached 5 kb  
53 resolution. Left heatmaps showing chromatin contact matrices from the whole chromosome 1  
54 (chr1) at 500 kb resolution in each of four cell samples. Right panel was a zoom-in heatmap  
55 for chr1: 162 ~ 162.8 Mb at 5 kb resolution. Maximum intensity was indicated in the lower  
56 right of each panel.

57

58

59

60

61

62

63

64

65

66

67

68

69

70

71

72

73

74

75

76

77

78

79

80

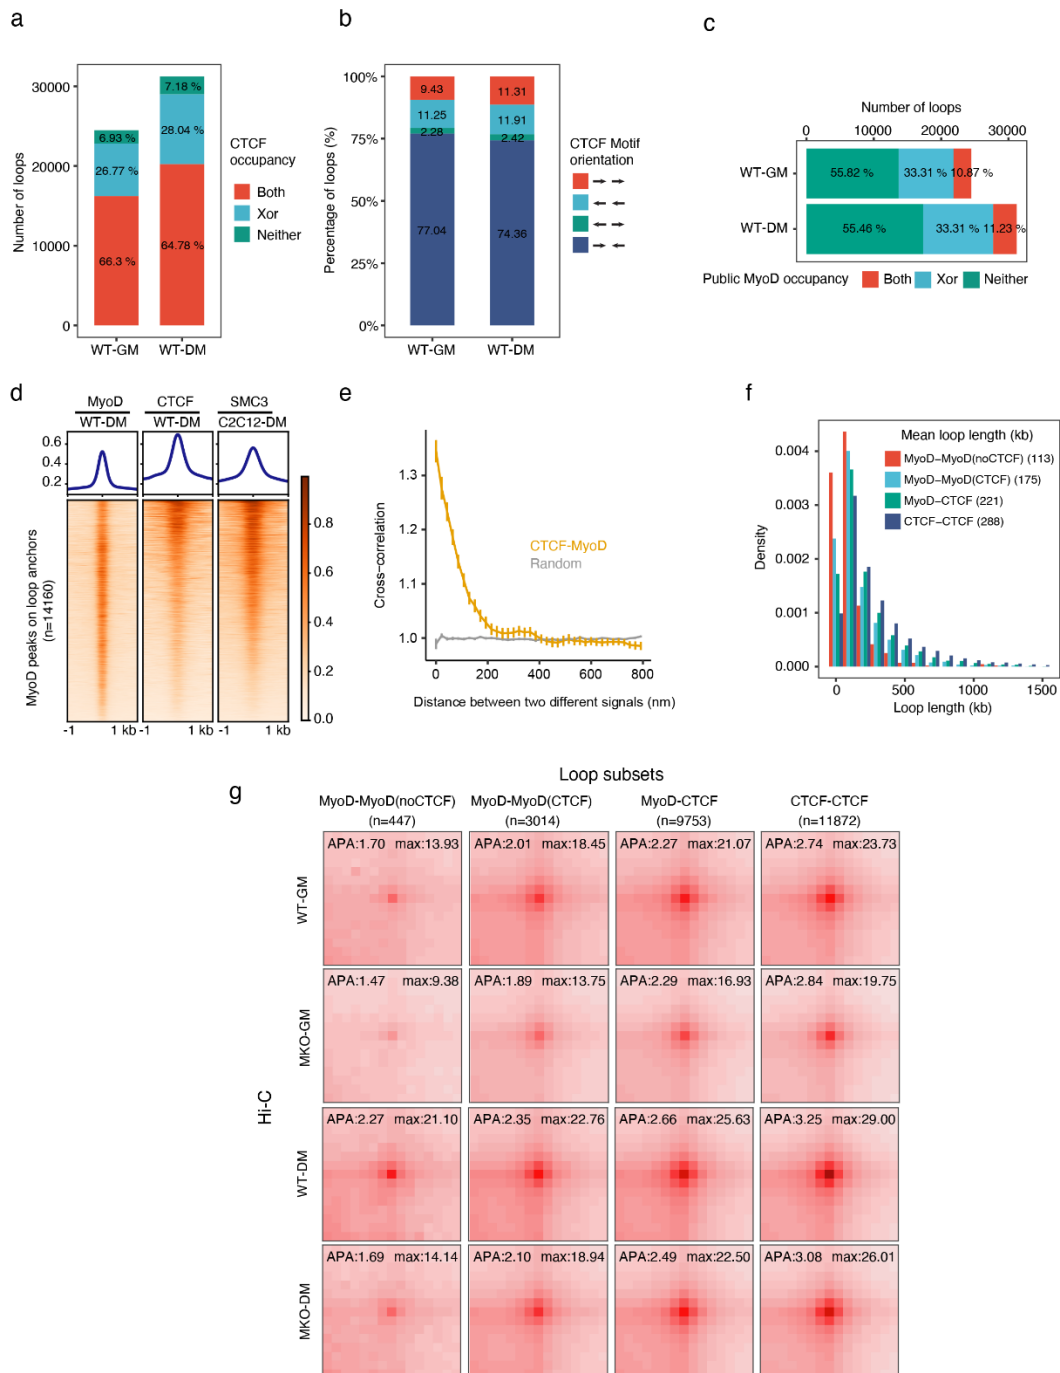

81

82

83

84

85

86

87

88

89 **Supplementary Fig. 2| MyoD mediates chromatin loop formation *in vivo* and *in vitro*. a**

90 The percentages of chromatin loops with CTCF bound at both anchors (Both, red), one of two

91 anchors (Xor, blue) or neither of two anchors (Neither, green) in WT-GM and WT-DM cells.

92 **b** Distribution CTCF motif orientation on loop anchors bound by CTCF in WT-GM and93 WT-DM cells. **c** The percentage of chromatin loops with anchors overlapped by public MyoD

94 peaks in primary myoblast and primary myotube cells (GSE56131). **d** Heatmaps of ChIP-seq  
95 signal showing the enrichment of MyoD, CTCF and SMC3 on MyoD-bound loop anchors,  
96 indicating the concordant binding of MyoD with CTCF and SMC3 on these loop anchors.  
97 MyoD and CTCF ChIP-seq were conducted in our study. ChIP-seq for SMC3 in C2C12 cells  
98 were referenced from public database (GSE113248). **e** Quantification of CTCF and MyoD  
99 colocalization in the dSTORM images, determined by the average cross-correlation ( $C(r)$ ). **f**  
100 Loop length distribution of MyoD-MyoD(noCTCF), MyoD-MyoD(CTCF), MyoD-CTCF and  
101 CTCF-CTCF chromatin loops. The average loop length was shown at upper right corner. **g**  
102 APA plots showing the aggregated Hi-C contacts around MyoD-bound three types of loops  
103 and CTCF-CTCF chromatin loops in MKO cells compared to WT cells. All four types of  
104 samples from GM and DM stages were shown.  $n$  represents number of each type of chromatin  
105 loops.

106

107

108

109

110

111

112

113

114

115

116

117

118

119

120

121

122

123

124

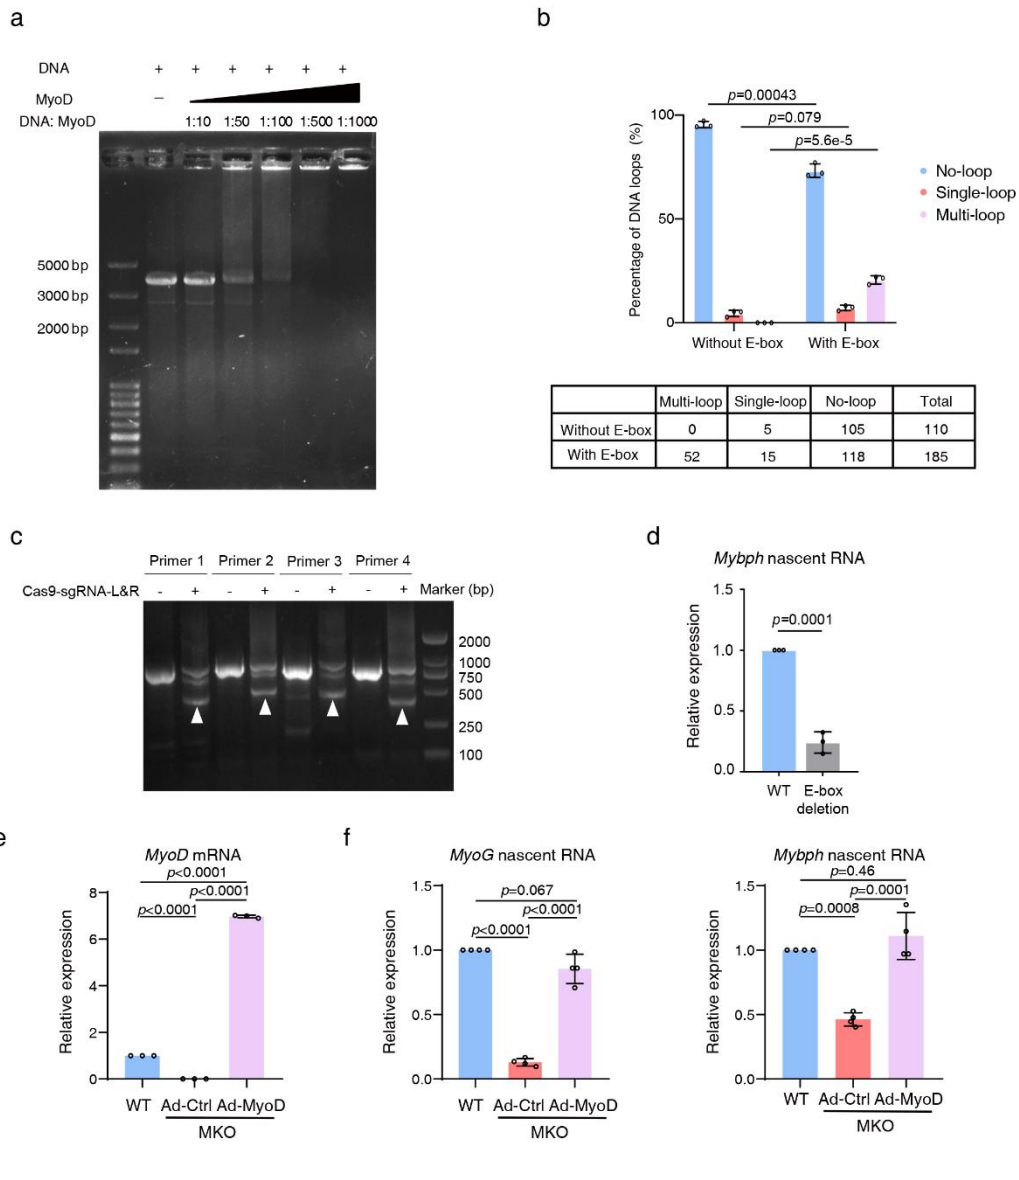

125

126

127

128

129

130

131

132

133 **Supplementary Fig. 3| MyoD directly instructs chromatin loops.** **a** Free and the

134 recombinant MyoD protein-bound DNA fragment (3.7kb, with E-box) were shown and

135 separated by polyacrylamide gel electrophoresis (PAGE). The binding of MyoD and DNA

136 fragment also showed ratio-dependency. **b** Statistics of the percentage and number of loops

137 observed with DNA circularization in Fig. 3a. Data are mean  $\pm$  SD. *p*-values were determined

138 using unpaired two-tailed Student's *t*-tests, \*\*\**p* < 0.001. *n* = 3 biologically independent

139 experiments. Source data are provided as a Source Data file. **c** Genotyping of the wild-type

140 (WT) and mutant (Cas9-sgRNA-L&R) cells, determined by PCR with four pairs of primers.

141 The white triangles indicated the truncated bands. **d** Relative expression of the *Mybph* gene

142 was determined by examining nascent RNA with qRT-PCR. Data are mean  $\pm$  SEM. *p*-values  
143 were determined using unpaired two-tailed Student's *t*-tests, \*\*\**p* < 0.001. *n* = 3 biologically  
144 independent samples. Source data are provided as a Source Data file. **e** Relative expression of  
145 *MyoD* in the cells described in Fig. 3e, determined by qRT-PCR. Data are mean  $\pm$  SEM.  
146 *p*-values were determined by performing an ANOVA followed by a Tukey's multiple  
147 comparison test, \*\*\**p* < 0.001. *n* = 3 biologically independent samples. Source data are  
148 provided as a Source Data file. **f** Relative levels of nascent RNA of *MyoG* or *Mybph* in the  
149 cells described in Fig. 3e, determined by qRT-PCR. Data are mean  $\pm$  SEM. *p*-values were  
150 determined by performing an ANOVA followed by a Tukey's multiple comparison test, \*\*\**p*  
151 < 0.001. *n* = 4 biologically independent samples. Source data are provided as a Source Data  
152 file.

153

154

155

156

157

158

159

160

161

162

163

164

165

166

167

168

169

170

171

172

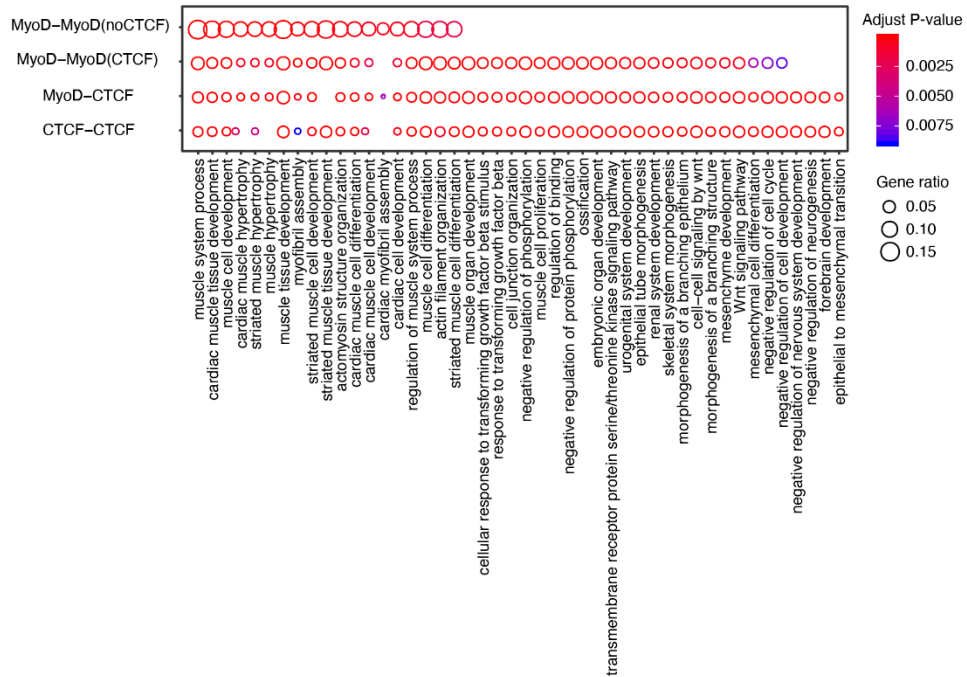

173

174

175

176

177

178

179

180 **Supplementary Fig. 4| MyoD and NeuroD2 instructs lineage specific chromatin loops.**

181 **a** The enriched GO terms of genes with promoter overlapped with anchors of  
182 MyoD-MyoD(noCTCF), MyoD-MyoD(CTCF), MyoD-CTCF and CTCF-CTCF chromatin  
183 loops. *p*-values of go term enrichment were determined using hypergeometric distribution and  
184 were adjusted by Benjamini–Hochberg method with ClusterProfiler.

185

186

187

188



189

190

191

192

193

194

195

196

197

198

199

200

201

202

203

204

205

206

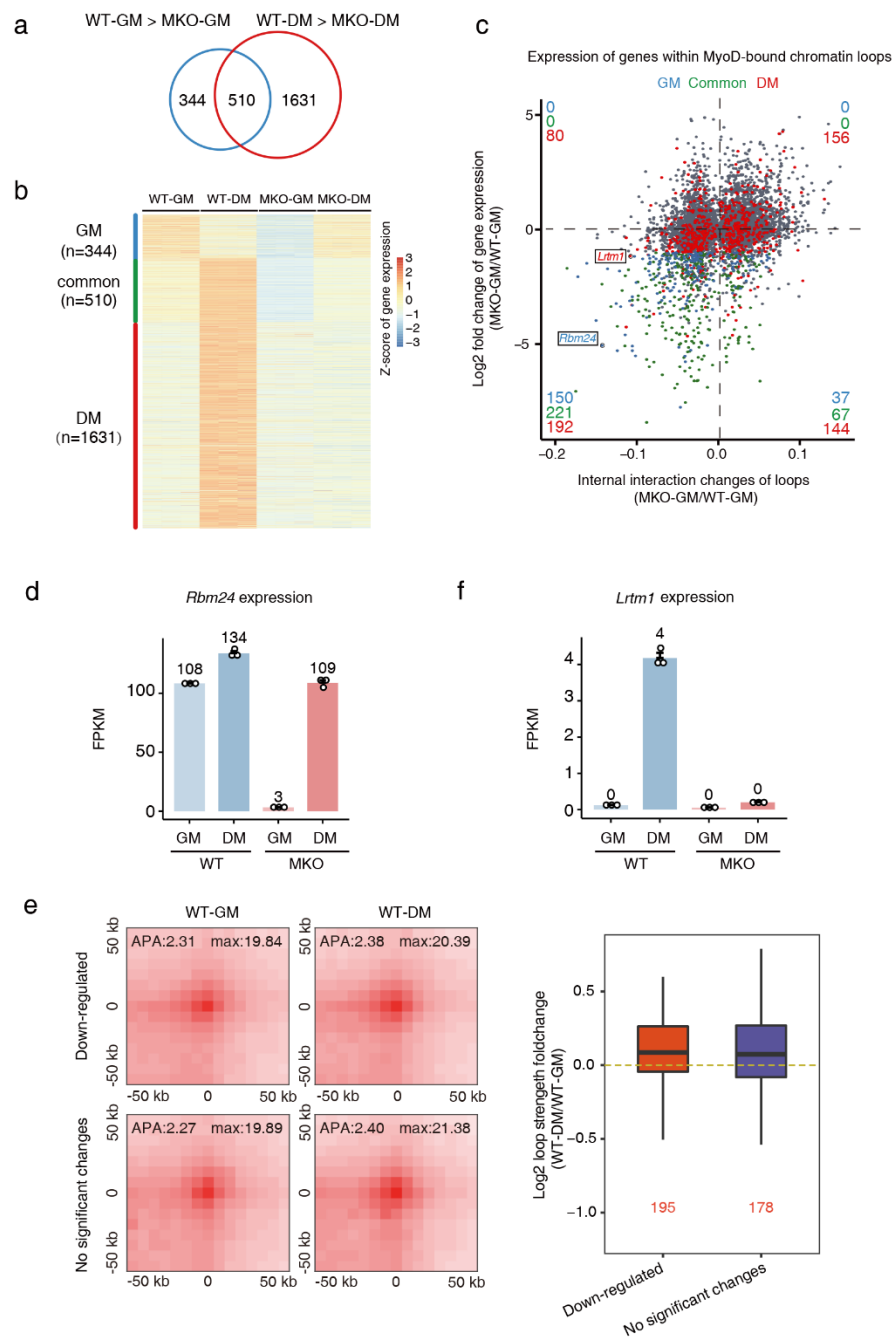

207 **Supplementary Fig. 5| MyoD mediates primed architectural loops in myoblasts. a** Venn

208 plot of the genes regulated by MyoD in WT-GM and WT-DM. **b** Gene expression heatmap of

209 MyoD regulated genes. **c** Scatter plot shows the gene expression fold changes versus the loop

210 domain score fold changes between WT-GM and MKO-GM. The numbers of the genes

211 commonly regulated or exclusively regulated by MyoD in WT-GM, WT-DM were marked in

212 each quadrant. **d** Boxplot showing the gene expression (FPKM) of *Rbm24* in four types of  
213 samples (WT-GM, WT-DM, MKO-GM and MKO-DM). Data are represented as mean  $\pm$ SD.  
214  $n = 3$  biologically independent samples. **e** Loop changes of MyoD-bound architectural loops  
215 during differentiation. APA plots showing the aggregated Hi-C contacts around internal  
216 interaction reduced MyoD-bound chromatin loops with down-regulated genes or not  
217 significantly changed genes in WT-GM and WT-DM cells (left panel). Boxplot showed the  
218 loop strength fold changes for loops with down-regulated genes or not significantly changed  
219 genes between WT-DM and WT-GM cells (right panel). The loop numbers were marked in  
220 red. Source data are provided as a Source Data file. **f** Boxplot showing the gene expression  
221 (FPKM) of *Lrtm1* among four types of samples (WT-GM, WT-DM, MKO-GM and  
222 MKO-DM). Data are represented as mean  $\pm$ SD.  $n = 3$  biologically independent samples.

223

224

225

226

227

228

229

230

231

232

233

234

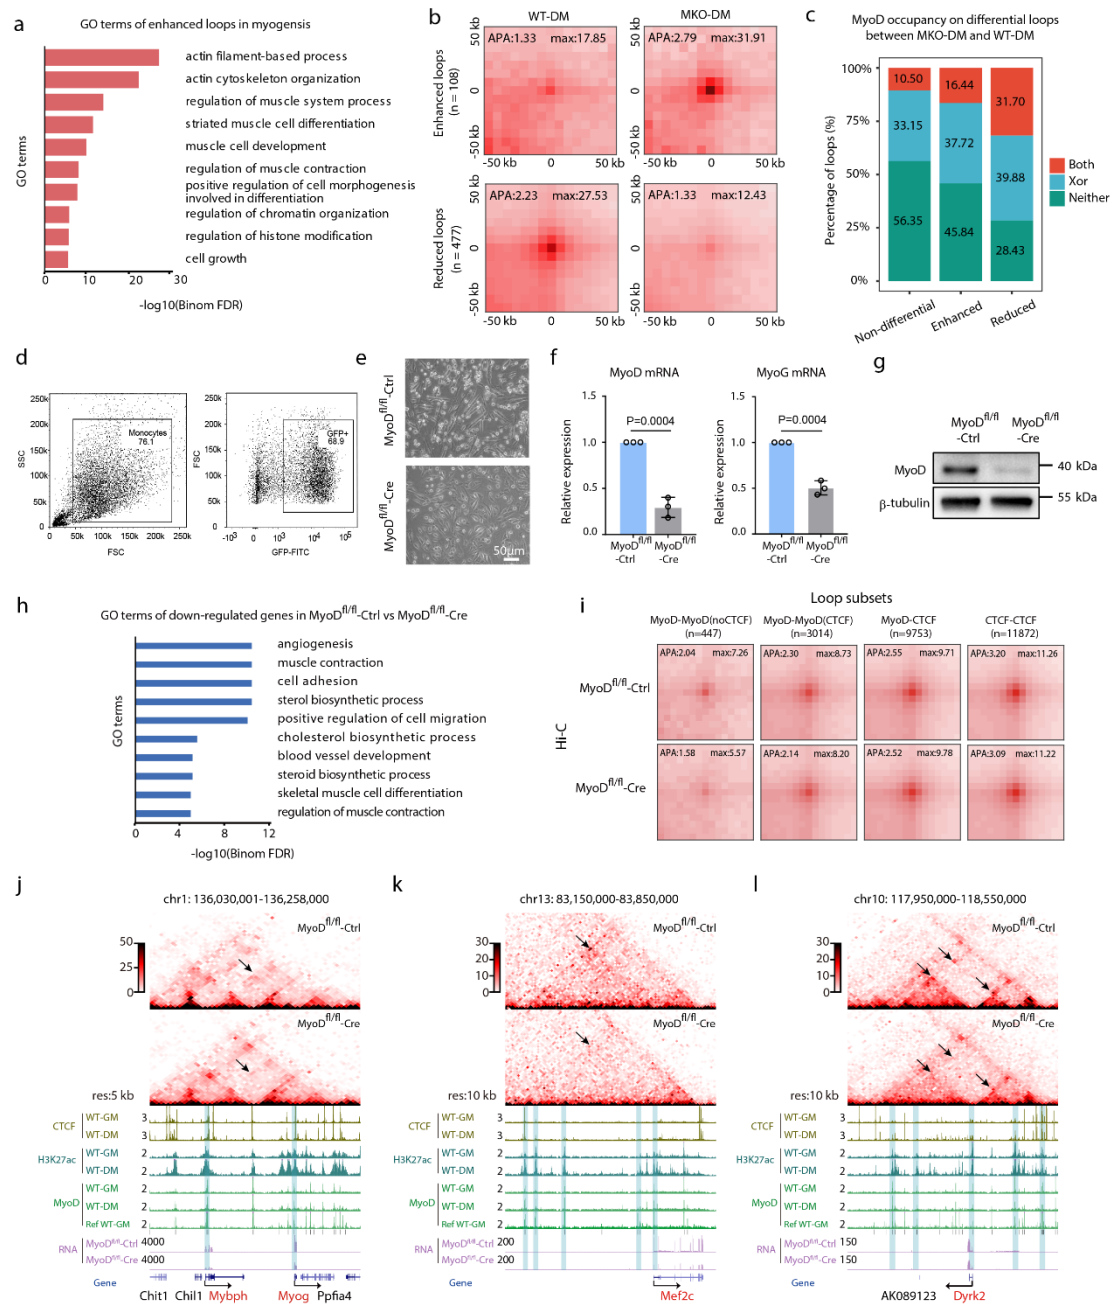

235

236 **Supplementary Fig. 6| MyoD-induced regulatory loops are functionally required for**  
 237 **muscle cell differentiation.** **a** The enriched GO terms of enhanced loops in WT-DM cells  
 238 compared with WT-GM cells. **b** APA plots showing aggregated Hi-C contacts around  
 239 significantly reduced or enhanced chromatin loops in MKO-DM cells compared to WT-DM  
 240 cells. *n* represents number of the differential chromatin loops between MKO-DM and  
 241 WT-DM cells. Differential loops were identified with DESeq2 (Methods). **c** Percentages of  
 242 MyoD-bound loops in the non-differential, enhanced or reduced chromatin loops described in

243 panel b. MyoD bound at both anchors (Both, red), one of two anchors (Xor, blue) or neither  
244 of two anchors (Neither, green) were shown. Pseudo-peaks of MyoD binding with combined  
245 ChIP-seq data from public and our study were used for this analysis. **d** Gating strategy used  
246 for FACS sorting of GFP positive cells. **e** Representative phase contrasts of primary  
247 myoblasts from MyoD<sup>fl/fl</sup> mice, infected with adenovirus expressing Cre enzyme  
248 (MyoD<sup>fl/fl</sup>-Cre) and induced for differentiation 24 h. Infection with Ad-GFP served as control  
249 (MyoD<sup>fl/fl</sup>-Ctrl). Scale bar represents 50  $\mu$ m. **f** Relative expression of *MyoD* and *MyoG* genes  
250 in cells described in **e**, determined by qRT-PCR. Data are mean  $\pm$  SEM. *p*-values were  
251 determined using unpaired two-tailed Student's *t*-tests, \*\*\**p* < 0.001. *n* = 3 biologically  
252 independent samples. Source data are provided as a Source Data file. **g** Representative  
253 immunoblot showing depleted MyoD protein in cells described in **e**. Source data are provided  
254 as a Source Data file. **h** Enriched GO terms of the differentially expressed genes between two  
255 type of cells described in **e**. **i** APA plots showing decreased strength of chromatin loops in  
256 MyoD<sup>fl/fl</sup>-Cre compared to MyoD<sup>fl/fl</sup>-Ctrl cells. **j-l** Hi-C heatmaps showing decreased loops at  
257 *MyoG-Mybph* (**j**), *Mef2c* (**k**) and *Dyrk2* (**l**) loci.

258

259

260

261

262

263

264

265

266

267

268

269

270

271

272

273

274

275

276

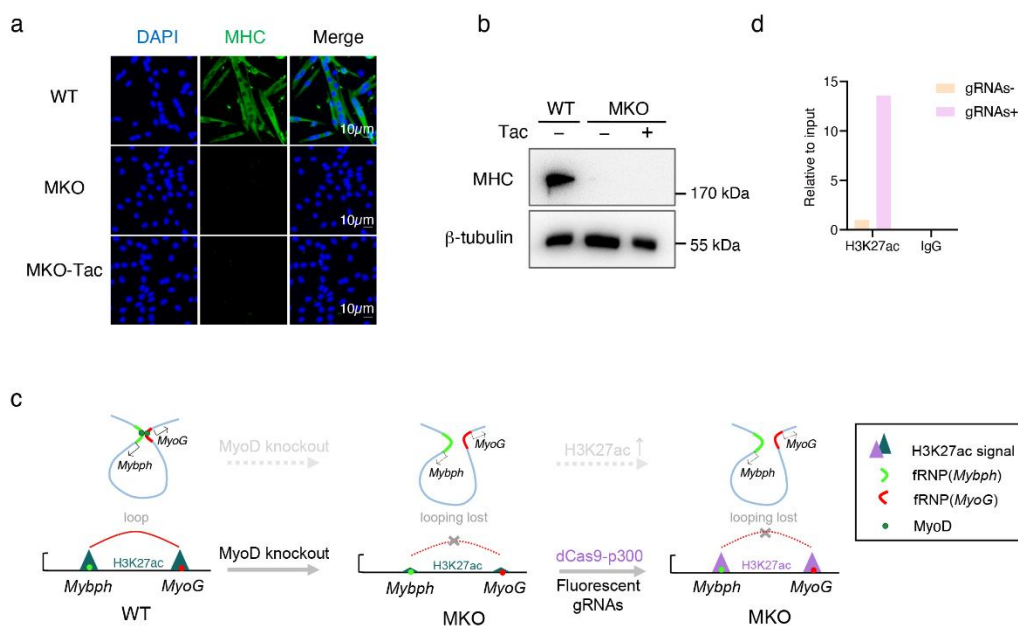

277 **Supplementary Fig. 7| Accumulation of H3K27ac in MKO cells do not re-establish the**

278 **diminished chromatin loop in *MyoD* null cells.** **a** Representative images for

279 immunostaining of myosin heavy chain (MHC, green) in WT or MKO cells treated with Tac

280 in differentiation medium for 48 h. DAPI (blue) served to visualize nuclei. The images are

281 representatives of three independent experiments. Scale bars represent 10  $\mu$ m. **b**

282 Representative western blot showing MHC protein in the cells described in **a**.  $\beta$ -tubulin

283 served as equal loading control. The data are representatives of three independent experiments.

284 Source data are provided as a Source Data file. **c** Schematic showing dCas9-p300-mediated

285 site-specific accumulation of H3K27ac in MKO cells. **d** ChIP-qPCR with H3K27ac

286 antibodies. The *MyoD* null cells were transfected with dCas9-p300core plasmid and sgRNA

287 pool against each anchor of *MyoG-Mybph* loop in growth medium and subsequently subjected

288 to ChIP analysis with H3K27ac antibodies. Mouse IgG served as control.
