# Supplementary material for: MyoD is a 3D genome structure organizer for muscle cell identity
Source: PubMed Central journal article supplement (PMC8752600; doi:10.1038/s41467-021-27865-6), 2022-01-11
Supplement: 41467_2021_27865_MOESM8_ESM.pdf [file 41467_2021_27865_MOESM8_ESM.pdf]

## Reporting Summary

Nature Research wishes to improve the reproducibility of the work that we publish. This form provides structure for consistency and transparency in reporting. For further information on Nature Research policies, see our [Editorial Policies](#) and the [Editorial Policy Checklist](#).

### Statistics

For all statistical analyses, confirm that the following items are present in the figure legend, table legend, main text, or Methods section.

n/a Confirmed

- The exact sample size ( $n$ ) for each experimental group/condition, given as a discrete number and unit of measurement
- A statement on whether measurements were taken from distinct samples or whether the same sample was measured repeatedly
- The statistical test(s) used AND whether they are one- or two-sided  
*Only common tests should be described solely by name; describe more complex techniques in the Methods section.*
- A description of all covariates tested
- A description of any assumptions or corrections, such as tests of normality and adjustment for multiple comparisons
- A full description of the statistical parameters including central tendency (e.g. means) or other basic estimates (e.g. regression coefficient) AND variation (e.g. standard deviation) or associated estimates of uncertainty (e.g. confidence intervals)
- For null hypothesis testing, the test statistic (e.g.  $F$ ,  $t$ ,  $r$ ) with confidence intervals, effect sizes, degrees of freedom and  $P$  value noted  
*Give  $P$  values as exact values whenever suitable.*
- For Bayesian analysis, information on the choice of priors and Markov chain Monte Carlo settings
- For hierarchical and complex designs, identification of the appropriate level for tests and full reporting of outcomes
- Estimates of effect sizes (e.g. Cohen's  $d$ , Pearson's  $r$ ), indicating how they were calculated

*Our web collection on [statistics for biologists](#) contains articles on many of the points above.*

### Software and code

Policy information about [availability of computer code](#)

Data collection No special software was used.

Data analysis HISAT2 (v2.1.0), HTSeq (v0.6.0), DESeq2 (v1.24.0), DAVID (v6.8), Bowtie2 (v2.3.5), SAMtools (v1.9), MACS2 (v2.2.5), UCSC Genome Browser utility, DiffBind (v2.10.0), deeptools (v3.0.1), ChIPseeker (v1.20.0), homer, Juicebox (v1.9.8), HiCDB, insulation scores, HiC-Pro (v2.11.1), bedtools (v2.27.1), coolpup.py, ClusterProfiler (v3.12.0), GREAT (v3.0.0), pyGenomeTracks (v3.1.2), Matlab (2019a), ImageJ (2.0.0) custom codes: HiCpipe (<https://github.com/ChenFengling/HiCpipe>)

For manuscripts utilizing custom algorithms or software that are central to the research but not yet described in published literature, software must be made available to editors and reviewers. We strongly encourage code deposition in a community repository (e.g. GitHub). See the Nature Research [guidelines for submitting code & software](#) for further information.

### Data

Policy information about [availability of data](#)

All manuscripts must include a [data availability statement](#). This statement should provide the following information, where applicable:

- Accession codes, unique identifiers, or web links for publicly available datasets
- A list of figures that have associated raw data
- A description of any restrictions on data availability

The raw sequence data reported in this paper have been deposited in the Genome Sequence Archive (GSA) under accession number CRA002490 that are publicly accessible at <https://bigd.big.ac.cn/gsa>. The processed data of this paper have been deposited in the Gene Expression Omnibus (GEO) database under the accession number: GSE157339.

Accession codes of the published data in GEO used in this study are as follows: MyoD ChIP-seq of wild-type primary myoblasts, GSE56131; MyoD ChIP-seq of wild-type primary myotubes, SRP001761; ATAC-seq of wild-type primary myoblasts, GSE63573; NeuroD2 ChIP-seq of embryonic cortical neuron cells, GSE67539; Hi-C

data of mouse neural development as well as CTCF and H3K27ac ChIP-seq of embryonic cortical neuron cells, GSE96107; SMC3 ChIP-seq of C2C12 myoblast and myotube, GSE113248. Data were aligned to mm9 genome. Source data are provided with this paper.

## Field-specific reporting

Please select the one below that is the best fit for your research. If you are not sure, read the appropriate sections before making your selection.

Life sciences  Behavioural & social sciences  Ecological, evolutionary & environmental sciences

For a reference copy of the document with all sections, see [nature.com/documents/nr-reporting-summary-flat.pdf](https://www.nature.com/documents/nr-reporting-summary-flat.pdf)

## Life sciences study design

All studies must disclose on these points even when the disclosure is negative.

|                 |                                                                                                                                                                                                                                                                                                                                                                                       |
|-----------------|---------------------------------------------------------------------------------------------------------------------------------------------------------------------------------------------------------------------------------------------------------------------------------------------------------------------------------------------------------------------------------------|
| Sample size     | No statistical methods were used to predetermine sample size. Sample sizes for 2 biological replicates of MyoD, CTCF, H3K27ac ChIP-seq and 3 biological replicates of RNA-seq in this study were used according to common practice in the field. Sample sizes for 3 to 8 biological replicates of Hi-C were determined in order to get enough complexity and depth for loop analysis. |
| Data exclusions | There is no data that were excluded from the analyses.                                                                                                                                                                                                                                                                                                                                |
| Replication     | Replication of sequencing data was confirmed by calculating correlation and reproducibility between replicates, as shown in figure and figure legend. Experiments were performed 2 to 3 times. Similar observation was made for each replicate. Merged representative result was shown in the figures.                                                                                |
| Randomization   | Experimental materials were not divided into random subgroups. Most comparisons were done between determined stages, or WT and mutants.                                                                                                                                                                                                                                               |
| Blinding        | The investigators were not blinded to allocation during experiments and outcome assessment, as the information on genotype and developmental stage of materials was essential for the experiment design and analysis.                                                                                                                                                                 |

## Reporting for specific materials, systems and methods

We require information from authors about some types of materials, experimental systems and methods used in many studies. Here, indicate whether each material, system or method listed is relevant to your study. If you are not sure if a list item applies to your research, read the appropriate section before selecting a response.

### Materials & experimental systems

| n/a                                 | Involved in the study                                           |
|-------------------------------------|-----------------------------------------------------------------|
| <input type="checkbox"/>            | <input checked="" type="checkbox"/> Antibodies                  |
| <input type="checkbox"/>            | <input checked="" type="checkbox"/> Eukaryotic cell lines       |
| <input checked="" type="checkbox"/> | <input type="checkbox"/> Palaeontology and archaeology          |
| <input type="checkbox"/>            | <input checked="" type="checkbox"/> Animals and other organisms |
| <input checked="" type="checkbox"/> | <input type="checkbox"/> Human research participants            |
| <input checked="" type="checkbox"/> | <input type="checkbox"/> Clinical data                          |
| <input checked="" type="checkbox"/> | <input type="checkbox"/> Dual use research of concern           |

### Methods

| n/a                                 | Involved in the study                              |
|-------------------------------------|----------------------------------------------------|
| <input type="checkbox"/>            | <input checked="" type="checkbox"/> ChIP-seq       |
| <input type="checkbox"/>            | <input checked="" type="checkbox"/> Flow cytometry |
| <input checked="" type="checkbox"/> | <input type="checkbox"/> MRI-based neuroimaging    |

## Antibodies

|                 |                                                                                                                                                                                                                                                                                                                                                                                                                                                                                          |
|-----------------|------------------------------------------------------------------------------------------------------------------------------------------------------------------------------------------------------------------------------------------------------------------------------------------------------------------------------------------------------------------------------------------------------------------------------------------------------------------------------------------|
| Antibodies used | MyoD antibody: Santa Cruz, sc32758, 5.8A; H3K27ac antibody: Abcam, ab4729; CTCF antibody: Cell Signaling, 2899S; CTCF antibody: Millipore, 07-729; Pax7 antibody: DSHB(no specified catalog number); MyoG antibody: DSHB, F5D; MHC antibody: DSHB, MF20; $\beta$ -tubulin antibody: CMCTAG, AT0003; Goat anti-mouse Alexa Fluor 488 (Life Technologies, A-11017); goat anti-rabbit Alexa Fluor 647(Life Technologies A-21246) and HRP-conjugate goat Anti-mouse IgG (ZSGB-BIO, ZB-2305). |
| Validation      | MyoD antibody (Santa Cruz, sc32758, 5.8A) is suitable for IF, western blot and ChIP-seq in mouse cells; H3K27ac antibody (Abcam, ab4729) and CTCF antibody (Cell Signaling, 2899S) are suitable for ChIP-seq in mouse cells; CTCF antibody ( Millipore, 07-729), Pax7 antibody (DSHB), MyoG antibody (DSHB, F5D), and MHC antibody (DSHB, MF20) are suitable for IF in mouse cells. $\beta$ -tubulin antibody (CMCTAG, AT0003) is suitable for western blot in mouse cells.              |

## Eukaryotic cell lines

Policy information about [cell lines](#)

Cell line source(s)

|                                                                      |                                                                                                                                                                                                                                                         |
|----------------------------------------------------------------------|---------------------------------------------------------------------------------------------------------------------------------------------------------------------------------------------------------------------------------------------------------|
| Authentication                                                       | MyoD is expressed in proliferating and differentiating C2C12 cells. C2C12 cells can differentiate to myocytes and myotube with the sequential expression of MyoG and MHC, measured by quantitative RT-PCR, western blot and immunofluorescent staining. |
| Mycoplasma contamination                                             | All cell lines tested negative for mycoplasma contamination.                                                                                                                                                                                            |
| Commonly misidentified lines<br>(See <a href="#">ICLAC</a> register) | None                                                                                                                                                                                                                                                    |

## Animals and other organisms

Policy information about [studies involving animals](#); [ARRIVE guidelines](#) recommended for reporting animal research

|                         |                                                                                                                                                                                                                                            |
|-------------------------|--------------------------------------------------------------------------------------------------------------------------------------------------------------------------------------------------------------------------------------------|
| Laboratory animals      | Mus musculus, strain: MyoD knockout mice (Jax #002523) were backcrossed with C57BL/6j for 2 generations (N2) in our colony and floxed MyoD mice with C57BL/6j background, male and female, 2~3 weeks.                                      |
| Wild animals            | None                                                                                                                                                                                                                                       |
| Field-collected samples | None                                                                                                                                                                                                                                       |
| Ethics oversight        | All the animal procedures were approved by the Animal Ethics Committee of Peking Union Medical College, Beijing, China (ACUC-A01-2016-003). Mice were housed in the animal facility and had free access to water and standard rodent chow. |

Note that full information on the approval of the study protocol must also be provided in the manuscript.

## ChIP-seq

### Data deposition

- Confirm that both raw and final processed data have been deposited in a public database such as [GEO](#).
- Confirm that you have deposited or provided access to graph files (e.g. BED files) for the called peaks.

|                                                                    |                                                                                                                                                                                                                                                                           |
|--------------------------------------------------------------------|---------------------------------------------------------------------------------------------------------------------------------------------------------------------------------------------------------------------------------------------------------------------------|
| Data access links<br><i>May remain private before publication.</i> | <a href="https://bigd.big.ac.cn/gsa/browse/CRA002490">https://bigd.big.ac.cn/gsa/browse/CRA002490</a> and GEO accession GSE157339 <a href="https://www.ncbi.nlm.nih.gov/geo/query/acc.cgi?acc=GSE157339">https://www.ncbi.nlm.nih.gov/geo/query/acc.cgi?acc=GSE157339</a> |
| Files in database submission                                       | Fastq and bigwig files of ChIP-seq data                                                                                                                                                                                                                                   |
| Genome browser session<br>(e.g. <a href="#">UCSC</a> )             | Not available                                                                                                                                                                                                                                                             |

### Methodology

|                         |                                                                                                                                                                                                     |
|-------------------------|-----------------------------------------------------------------------------------------------------------------------------------------------------------------------------------------------------|
| Replicates              | 2 biological replicates for MyoD, CTCF, H3K27ac ChIP-seq, no replicate for input data                                                                                                               |
| Sequencing depth        | 30M reads for each MyoD and CTCF ChIP-Seq replicates and input. 20M reads for each H3K27ac ChIP-Seq replicates and input.                                                                           |
| Antibodies              | MyoD antibody: Santa Cruz, sc32758; H3K27ac antibody: Abcam, ab4729; CTCF antibody: Cell Signaling, 2899S                                                                                           |
| Peak calling parameters | Default parameters of MACS2                                                                                                                                                                         |
| Data quality            | Reads with a Phred quality score of <20 were removed. Non-unique reads were removed by SAMtools. Quality were assessed by deeptools and UCSC Genome Browser visualization and replicate clustering. |
| Software                | Bowtie2 (v2.3.5), SAMtools (v1.9), MACS2 (v2.2.5), UCSC Genome Browser utility, DiffBind (v2.10.0), deeptools (v3.0.1), ChIPseeker (v1.20.0)                                                        |

## Flow Cytometry

### Plots

Confirm that:

- The axis labels state the marker and fluorochrome used (e.g. CD4-FITC).
- The axis scales are clearly visible. Include numbers along axes only for bottom left plot of group (a 'group' is an analysis of identical markers).
- All plots are contour plots with outliers or pseudocolor plots.
- A numerical value for number of cells or percentage (with statistics) is provided.

## Methodology

### Sample preparation

Primary myoblasts were isolated from the hindlimb skeletal muscle of floxed MyoD mice at 2~3 weeks, minced and digested in a mixture of type II collagenase and Dispase B (Roche Applied Science). Cells were filtered from debris, centrifuged and cultured in growth medium (F-10 Ham's medium supplemented with 20% FBS, 10 ng/ml basic fibroblast growth factor, 1% penicillin– streptomycin and 1% glutamine) on collagen-coated cell culture plates at 37 °C in 5% CO<sub>2</sub>. The proliferating cells were infected with Cre- and GFP-expressing adenovirus (Ad-Cre). Solely GFP-expressing adenovirus served as control (Ad-ctrl). Then, the GFP positive cells were sorted 48 h post infection. The FACS-sorted GFP positive cells were plated at 60-70% confluence and switched to differentiation medium (DMEM with 2% horse serum) to induce differentiation for 24 h. Finally, the differentiating cells were collected and subjected to perform BL-HiC analysis.

### Instrument

Flow cytometer ARIA III

### Software

FlowJo 10.4, java version: 1.8.0\_144-b01

### Cell population abundance

76.1% of the cells were monocytes. Over 90% of the monocytes were GFP-positive cells.

### Gating strategy

We selected SSC and FSC to determine the range of monocytes, as indicated in Supplementary Fig. 6D (left panel), then selected monocytes population using FSC/GFP-FITC to determine GFP positive cells, as indicated in Supplementary Fig. 6D (right panel). There was a clear boundary between GFP-positive and GFP-negative cell population.

Tick this box to confirm that a figure exemplifying the gating strategy is provided in the Supplementary Information.
